# Supplementary material
Source: PubMed Central journal article supplement (PMC6421995)
Supplement: Supp_Fig2.pdf [file Supp_Fig2.pdf]

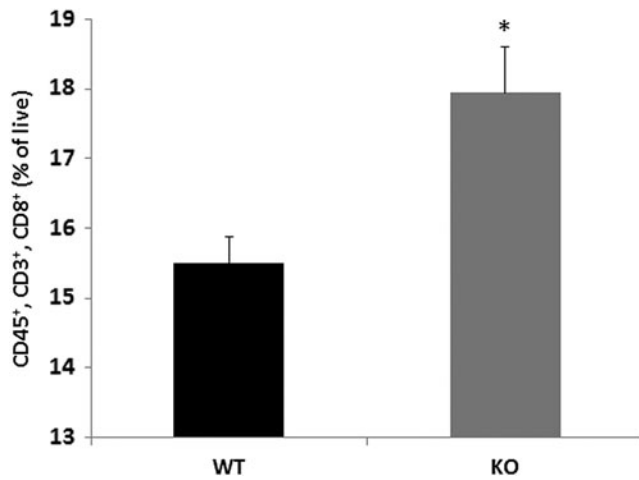

**SUPPLEMENTARY FIG. S2.** The percentage of CD8 cytotoxic T cells is upregulated in the lung of Nrf2 KO mice *versus* Nrf2 WT mice at early stages (4–8 weeks after initiation with vinyl carbamate) of carcinogenesis. The same two lobes of the right lung were homogenized and immune populations were analyzed by flow cytometry. CD8<sup>+</sup> T cells are significantly increased in the lung of Nrf2 KO mice.  $n=8/\text{group}$ ;  $*p<0.05$ .
