# Supplementary material
Source: PubMed Central journal article supplement (PMC6421995)
Supplement: Supp_Fig3.pdf [file Supp_Fig3.pdf]

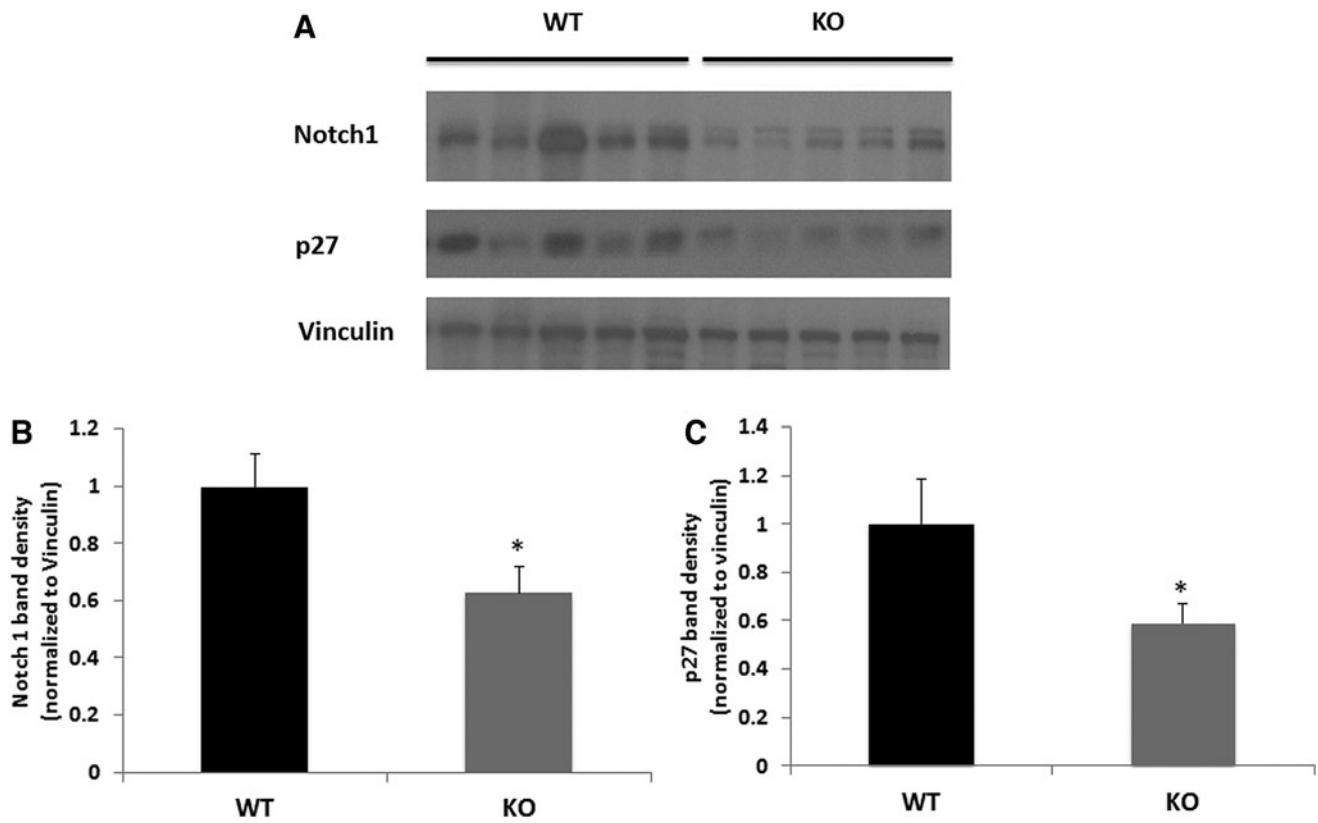

**SUPPLEMENTARY FIG. S3. Nrf2 deficiency significantly downregulates Notch1 and p27 protein expression in the lung.** Total protein was extracted from lung tissue of Nrf2 WT and KO mice. Protein levels of Notch1 and p27 were detected by Western blotting (A). Quantification of Notch1 (B) and p27 (C) was analyzed by ImageJ. \* $p < 0.05$  WT versus KO.
